# Supplementary material
Source: HighWire-hosted journal article supplement (http://molpharm.aspetjournals.org/highwire/filestream/77347/field_highwire_adjunct_files/2/Supplemental_data_95869.pdf)
Supplement: Supplemental_data_95869.pdf [file Supplemental_data_95869.pdf]

**Exon 3 splicing and mutagenesis identify residues influencing cell surface density of heterologously-expressed silkworm (*Bombyx mori*) glutamate-gated chloride channels**

Shogo Furutani, Makoto Ihara, Yuri Nishino, Miki Akamatsu, Andrew K. Jones, David B. Sattelle and Kazuhiko Matsuda

Department of Applied Biological Chemistry, Faculty of Agriculture, Kinki University, 3327-204 Naka-machi Nara, 631-8505, Japan (SF, MI, KM)

Graduate School of Life Science, University of Hyogo, 3-2-1, Koto, Kamigori-cho, Ako-gun, Hyogo 678-1297, Japan (YN)

Graduate School of Agriculture, Kyoto University, Sakyo-Ku, Kyoto 606-8502, Japan (MA)

Department of Biological and Medical Sciences, Faculty of Health and Life Sciences, Oxford Brookes University, Gipsy Lane, Oxford, OX3 0BP, United Kingdom (AKJ)

The Wolfson Institute for Biomedical Research, Department of Medicine, Cruciform Building, University College London, Gower Street, London, WC1E 6BT, United Kingdom (DBS)

*Molecular Pharmacology*

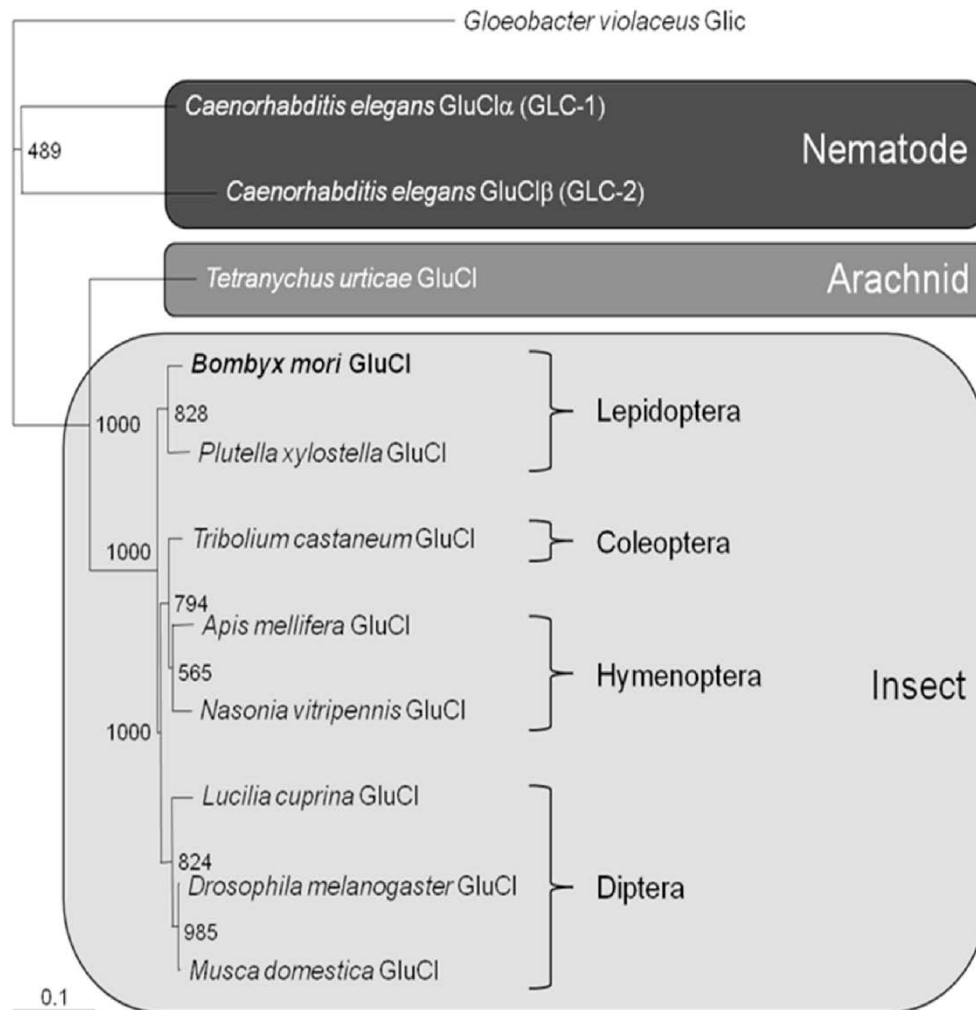

Supplemental Figure 1. Tree showing relationship of *Bombyx mori* GluCl (highlighted in bold) with other GluCl proteins. *Phylogenetic analysis of BmGluCl*—The neighbor-joining method and bootstrap resampling, available with the ClustalX program, were used to construct a phylogenetic tree, which was then displayed using the TreeView application. Identity values between full length subunit peptide sequences were calculated using the GeneDoc program (<http://www.psc.edu/biomed/genedoc>). Numbers at each branch signify bootstrap values with 1000 replicates and the scale bar represents substitutions per site. The tree is rooted by the bacterial protein Glic, an ancestral ligand-gated ion channel. The accession numbers of protein sequences used to construct the tree are: *Apis mellifera* GluCl (GB11639), *Bombyx mori* GluCl (Exon 3a variant, KC342243), *Caenorhabditis elegans* GluCl $\alpha$  (NP\_507090) and GluCl $\beta$  (NP\_491470), *Drosophila melanogaster* GluCl (AAG40735), *Gloeobacter violaceus* Glic (2XQ8.A), *Lucilia cuprina* (AAC31949), *Musca domestica* GluCl (BAD16657), *Nasonia vitripennis* GluCl (NP\_001171232), *Plutella xylostella* GluCl (ACT09139), *Tetranychus urticae* GluCl (BAJ41378) and *Tribolium castaneum* GluCl (ABU63599.1).

Supplemental Table 1. Exon specific primers for real time PCR analyses

| Target sequence    | Forward (5' to 3')   | Reverse (5' to 3')       |
|--------------------|----------------------|--------------------------|
| Exon 3a            | CGGCAAGATAAACTTCAGG  | CATTTTAATATCACTAATTGTCTG |
| Exon 3b            | CGGCAAGATAAACTTCAGG  | CATTGTGACGTCATCGATC      |
| Exon 3c            | CGGCAAGATAAACTTCAGG  | CATTTTGTAATCATCTATTTTGC  |
| Exon 3Δ            | CAACGGAAGTATGAATACTC | CCTTCCTAAATTGTAACTTCAG   |
| Exon 9             | CAAAAGCCATCGACGTCTG  | CTTAGTGTCCACGCCACCGC     |
| Exon 9 partially Δ | CAAAAGCCATCGACGTCTG  | CTGCCGCATCATAGCGAAG      |

Supplemental Table 2. Primers used to chimeras of exon 3a and 3c variants

| Target sequence             | Forward (5' to 3')                                              | Reverse (5' to 3')                                              |
|-----------------------------|-----------------------------------------------------------------|-----------------------------------------------------------------|
| Block I Exon 3a to Exon 3c  | GGCGATGCGCCAACGTTAGTTCGCGTCAACAT<br>GTATCTGAGAAGCATAACGACAATTAG | CAGATACATGTTGACGCGAACTAACGTTGGC<br>GCATCGCCAGTTCGGTTGATGCCTGACG |
| Block I Exon 3c to Exon 3a  | GATGGCCCAGCCGTCGTTAATATAAACCTGTT<br>TGTGCGATCCATCAGCAAAAATAGATG | CAAACAGGTTTATATTAACGACGGCTGGGCC<br>ATCAGTTCGGTTGATGCCTGACGGTC   |
| Block II Exon 3a to Exon 3c | CGTTAATATAAACCTGTTTGTGAGAAGCATAA<br>GCAAAAATAGATGATTACAAAATG    | CTCTGAACGTGAGTTGCACAGAGTATTCCAT<br>TTTGTAAATCATCTATTTTGTCTG     |
| Block II Exon 3c to Exon 3a | GTTCGCGTCAACATGTATCTGCGATCCATCAC<br>GACAATTAGTGATATTAATAATG     | CTGAACGTGAGTTGCACAGAGTATTCCATTT<br>TAATATCACTAATTGTCTG          |

Supplemental Table 3. Primers used to mutate cDNAs in Block II of exon 3

| Exon 3a         |                                 | Exon 3c         |                                 |
|-----------------|---------------------------------|-----------------|---------------------------------|
| Name            | Sequence (5' to 3')             | Name            | Sequence (5' to 3')             |
| A-1 (Wild type) | AATTGTCGTTATGCTTCTCACAAACAGGTT  | C-1 (Wild type) | TATTTTGCTGATGGATCGCAGATACATGTT  |
| A-2 (T77S)      | AATTGTGCTTATGCTTCTCACAAACAGGTT  | C-2 (S78T)      | TATTTTCGTGATGGATCGCAGATACATGTT  |
| A-3 (T78K)      | AATTTTCGTTATGCTTCTCACAAACAGGTT  | C-3 (K79T)      | TATTGTGCTGATGGATCGCAGATACATGTT  |
| A-4 (T77S-T78K) | AATTTTCGTTATGCTTCTCACAAACAGGTT  | C-A (Wild type) | GATGATTACAAAATGGAATACTCTGTGCAA  |
| A-A (Wild type) | AGTGATATTAATAATGGAATACTCTGTGCAA | C-B (D81S)      | AGTGATTACAAAATGGAATACTCTGTGCAA  |
| A-B (S80D)      | GATGATATTAATAATGGAATACTCTGTGCAA | C-C (Y83I)      | GATGATATTAATAATGGAATACTCTGTGCAA |
| A-C (I82Y)      | AGTGATTACAAAATGGAATACTCTGTGCAA  |                 |                                 |
| A-D (S80D-I82Y) | GATGATTACAAAATGGAATACTCTGTGCAA  |                 |                                 |

A-2 (T77S) and A-D (S80D-I82Y) primers were used to prepare the T77S;S80D;I82Y mutant of exon 3a variant, while C-2 (S78T) and C-A (Wild type) primers were used to prepare the S78T mutant of exon 3c variant. In a similar way, the other mutants were prepared with appropriate primers shown above.
